# Supplementary material
Source: PubMed Central journal article supplement (PMC5278305)
Supplement: aww302_supp.pdf [file aww302_supp.pdf]

Supplementary Table 1. Percentage of participants who exhibited specific patterns of remission and relapse.

| Diagnosis                                            | N   | Never seized, before or during study | No history of seizures, but seizures started during study, and then: |                 |                   |                 |                             | History of seizures before study, not seizing at study start (1st remission), and then: |                 |                   |                 |                   | History of seizures before study, continued seizing at study start, and then: |                   |                 |                   |                 |                   |                             |
|------------------------------------------------------|-----|--------------------------------------|----------------------------------------------------------------------|-----------------|-------------------|-----------------|-----------------------------|-----------------------------------------------------------------------------------------|-----------------|-------------------|-----------------|-------------------|-------------------------------------------------------------------------------|-------------------|-----------------|-------------------|-----------------|-------------------|-----------------------------|
|                                                      |     |                                      | had 1st remission                                                    | had 1st relapse | had 2nd remission | had 2nd relapse | never experienced remission | remained in remission throughout the study                                              | had 1st relapse | had 2nd remission | had 2nd relapse | had 3rd remission | had 3rd relapse                                                               | had 1st remission | had 1st relapse | had 2nd remission | had 2nd relapse | had 3rd remission | never experienced remission |
| Classic Rett syndrome female                         | 915 | 30.8%                                | 3.6%                                                                 | 1.1%            | 0.9%              |                 | 9.2%                        | 16.5%                                                                                   | 3.9%            | 3.4%              | 1.2%            | 1.0%              | 0.1%                                                                          | 4.7%              | 3.6%            | 1.6%              | 0.7%            | 0.1%              | 17.6%                       |
| Atypical mild Rett syndrome female                   | 78  | 44.9%                                | 1.3%                                                                 | 1.3%            |                   | 1.3%            | 3.8%                        | 25.6%                                                                                   | 1.3%            | 6.4%              |                 |                   |                                                                               | 2.6%              | 3.8%            | 1.3%              | 1.3%            |                   | 5.1%                        |
| Atypical severe Rett syndrome female                 | 81  | 22.2%                                | 6.2%                                                                 |                 |                   | 1.2%            | 6.2%                        | 22.2%                                                                                   | 3.7%            | 1.2%              |                 | 2.5%              |                                                                               | 4.9%              | 7.4%            | 2.5%              |                 |                   | 19.8%                       |
| MECP2 mutation female without clinical Rett syndrome | 42  | 69.0%                                | 2.4%                                                                 | 2.4%            |                   |                 |                             | 16.7%                                                                                   |                 |                   |                 |                   |                                                                               |                   | 2.4%            |                   |                 |                   | 7.1%                        |
| MECP2 duplication female                             | 8   | 87.5%                                |                                                                      |                 |                   |                 |                             | 12.5%                                                                                   |                 |                   |                 |                   |                                                                               |                   |                 |                   |                 |                   |                             |
| CDKL5                                                | 2   |                                      |                                                                      |                 |                   |                 |                             |                                                                                         |                 |                   |                 |                   |                                                                               | 50.0%             |                 |                   |                 |                   | 50.0%                       |
| Classic Rett syndrome male                           | 1   |                                      | 100.0%                                                               |                 |                   |                 |                             |                                                                                         |                 |                   |                 |                   |                                                                               |                   |                 |                   |                 |                   |                             |
| Atypical severe Rett syndrome male                   | 1   |                                      |                                                                      |                 |                   |                 |                             |                                                                                         |                 |                   |                 |                   |                                                                               |                   |                 |                   |                 |                   | 100.0%                      |
| MECP2 mutation male without clinical Rett syndrome   | 20  | 40.0%                                |                                                                      |                 |                   |                 | 5.0%                        | 15.0%                                                                                   | 5.0%            | 5.0%              |                 |                   |                                                                               |                   | 10.0%           |                   |                 |                   | 20.0%                       |
| MECP2 duplication male                               | 28  | 50.0%                                |                                                                      |                 |                   |                 | 7.1%                        | 14.3%                                                                                   | 3.6%            |                   |                 |                   |                                                                               |                   | 7.1%            |                   |                 |                   | 17.9%                       |

Not all participants had complete historical data, therefore n is less than total n in study.

CDKL5 = cyclin-dependent kinase-like 5; MECP2 = Methyl-CpG Binding Protein 2 gene
